# Supplementary material
Source: MDPI journal article supplement (https://www.mdpi.com/2077-1312/10/1/98)
Supplement: s1 [file s1]

Supplementary Material for:

# Current Dependent Dispersal Characteristics of Japanese Glass Eel around Taiwan

Kuan-Mei Hsiung, Yen-Ting Lin and Yu-San Han

**Supplementary Table S1.** The original catch data from 2010 to 2020 (number of the glass eel) at the 10 sampling sites in Taiwan (Tamsui, Hsinchu Miaoli, Changhua, Yunlin, Chiayi, Tainan, Pingtung, Ilan, Hualien, and Taitung) were collected according to the Taiwan Japanese Glass Eel Reporting System (Fisheries Agency, Council of Agriculture, Executive Yuan, Taiwan). W represents the week; NA means no catch data has been reported during that week.

| Year<br>Week | 2010  | 2011 | 2012   | 2013    | 2014   | 2015   | 2016   | 2017   | 2018   | 2019    | 2020   |
|--------------|-------|------|--------|---------|--------|--------|--------|--------|--------|---------|--------|
| Tamsui       |       |      |        |         |        |        |        |        |        |         |        |
| Nov W1       | NA    | NA   | NA     | NA      | NA     | NA     | NA     | NA     | NA     | NA      | NA     |
| Nov W2       | NA    | 50   | 692    | NA      | NA     | NA     | NA     | NA     | NA     | NA      | NA     |
| Nov W3       | NA    | 30   | 1530   | 24000   | 8597   | 3705   |        | 6113   | NA     | 265     | 13066  |
| Nov W4       | 2000  | 170  | 10721  | 247325  | 6897   | 7738   | 160385 | 9753   | NA     | 17146   | 25386  |
| Dec W1       | 75003 | 127  | 52520  | 151589  | 31728  | 10496  | 468979 | 15658  | 28698  | 23656   | 131854 |
| Dec W2       | 52503 | 70   | 99510  | 817388  | 304251 | 28235  | 147991 | 19054  | 274566 | 21995   | 241871 |
| Dec W3       | 54100 | 119  | 82610  | 869017  | 162059 | 76733  | 127563 | 20911  | 248522 | 19927   | 337709 |
| Dec W4       | 52000 | 393  | 20990  | 927325  | 34552  | 65402  | 131708 | 28362  | 306233 | 17715   | 266663 |
| Jan W1       | 63000 | 198  | 100600 | 834390  | 48385  | 39927  | 186826 | 35764  | 597762 | 28007   | 210862 |
| Jan W2       | 58500 | 52   | 141350 | 352302  | 40136  | 65646  | 242328 | 40231  | 857363 | 124221  | 183952 |
| Jan W3       | 25500 | 77   | 178000 | 676321  | 40083  | 110962 | 201246 | 43526  | 559790 | 185207  | 191373 |
| Jan W4       | 39000 | 280  | 137510 | 713197  | 80217  | 163825 | 138051 | 56238  | 163393 | 686562  | 214055 |
| Feb W1       | NA    | 450  | 57350  | 1077694 | 97121  | 377061 | 91903  | 89791  | 28459  | 931868  | 223505 |
| Feb W2       | 8500  | 175  | 30900  | 539825  | 50398  | 571960 | 83974  | 119584 | 9640   | 1007719 | 184469 |
| Feb W3       | 18500 | 162  | 32870  | 463915  | 43781  | 263770 | 94106  | 131314 | 13749  | 781599  | 122964 |
| Feb W4       | NA    | 170  | 32920  | 33905   | 29867  | 95240  | 80038  | 128479 | 15715  | 552036  | 45713  |
| Year<br>Week | 2010  | 2011 | 2012   | 2013    | 2014   | 2015   | 2016   | 2017   | 2018   | 2019    | 2020   |
| Hsinchu      |       |      |        |         |        |        |        |        |        |         |        |
| Nov W1       | NA    | 18   |        | NA      | NA     | NA     | NA     | NA     | NA     | NA      | NA     |
| Nov W2       | NA    | 1000 | 4      | NA      | 1850   | NA     | NA     | NA     | NA     | 54      | NA     |
| Nov W3       | NA    | 1684 | 9      | NA      | 1900   | NA     | NA     | NA     | 245    | 332     | 13066  |
| Nov W4       | NA    | 2206 | 44     | 9890    | 1790   | 1475   | 1557   | 59     | 3292   | 2123    | 25386  |
| Dec W1       | NA    | 1341 | 228    | 32919   | 2350   | 4424   | 53734  | 253    | 13127  | 3399    | 131854 |
| Dec W2       | NA    | 616  | 758    | 69544   | 1400   | 9003   | 28716  | 157    | 18899  | 5451    | 241871 |
| Dec W3       | NA    | 87   | 863    | 72400   | 2100   | 3505   | 34194  | 2398   | 26496  | 4042    | 337709 |
| Dec W4       | NA    | 14   | 418    | 35022   | 2230   | 7993   | 52127  | 3147   | 25369  | 46732   | 266663 |
| Jan W1       | NA    | NA   | 697    | 33236   | 2950   | 7075   | 46441  | 4524   | 33570  | 40808   | 210862 |
| Jan W2       | NA    | NA   | 411    | 37451   | 3624   | 9555   | 62053  | 3652   | 74106  | 56153   | 183952 |
| Jan W3       | NA    | NA   | 422    | 35866   | 2830   | 15331  | 44515  | 4220   | 26197  | 65968   | 191373 |
| Jan W4       | NA    | NA   | 417    | 38458   | 4120   | NA     | 31069  | 19828  | 18048  | 87225   | 214055 |
| Feb W1       | NA    | NA   | 79     | 36703   | 3325   | 69987  | 987    | 27116  | 19377  | 154282  | 223505 |
| Feb W2       | NA    | NA   | NA     | 36332   | 1870   | NA     | 20200  | 19282  | 16506  | 280419  | 184469 |
| Feb W3       | NA    | NA   | NA     | 36378   | 3180   | 59396  | 18828  | 40731  | 8071   | 239016  | 122964 |
| Feb W4       | NA    | NA   | NA     | 41712   | 3650   | 9222   | 30885  | 36189  | 3868   | 151710  | 45713  |
| Year<br>Week | 2010  | 2011 | 2012   | 2013    | 2014   | 2015   | 2016   | 2017   | 2018   | 2019    | 2020   |
| Changhua     |       |      |        |         |        |        |        |        |        |         |        |
| Nov W1       | NA    | NA   | NA     | NA      | NA     | NA     | NA     | NA     | NA     | NA      | NA     |
| Nov W2       | NA    | 450  | NA     | NA      | NA     | NA     | NA     | NA     | 3046   | 5       | NA     |

|        |        |       |       |        |       |       |        |       |       |        |        |
|--------|--------|-------|-------|--------|-------|-------|--------|-------|-------|--------|--------|
| Nov W3 | NA     | 870   | NA    | NA     | NA    | 1400  | NA     | NA    | 3478  | 647    | 150    |
| Nov W4 | 1307   | 9800  | 1845  | 17900  | 6700  | 9600  | 400    | NA    | 5856  | 1400   | 8311   |
| Dec W1 | 5500   | 6000  | 3370  | 54000  | 9704  | 7100  | 2300   | NA    | 17730 | 4225   | 9260   |
| Dec W2 | 14000  | 4010  | 3750  | 170744 | 13068 | 8650  | 20400  | 231   | 16834 | 2628   | 10886  |
| Dec W3 | 10500  | 7500  | 3200  | 135000 | 6642  | 6850  | 23703  | 5035  | 28116 | 16456  | 18515  |
| Dec W4 | 18000  | 21000 | 4000  | 92100  | 5723  | 5300  | 39857  | 4046  | NA    | 89986  | 18020  |
| Jan W1 | 14500  | 14750 | 3600  | 90000  | 6630  | 30136 | 68491  | NA    | 78577 | 127632 | 22696  |
| Jan W2 | 16000  | 3500  | 19000 | 103624 | 6062  | 34602 | 152270 | 6676  | 37258 | 65019  | 16341  |
| Jan W3 | 30000  | 21000 | 27200 | 33852  | 6448  | 98700 | 91578  | 2699  | 29518 | 63236  | 17996  |
| Jan W4 | 43000  | NA    | 49000 | 21266  | 14098 | 82500 | 55896  | 6396  | 9146  | 70818  | 136800 |
| Feb W1 | 106000 | 26200 | 23500 | 25014  | 31749 | 16000 | 49675  | 4860  | NA    | NA     | 104900 |
| Feb W2 | 24000  | 15500 | 8400  | 48922  | 20148 | 42500 | NA     | 4600  | 19529 | 53729  | 56135  |
| Feb W3 | 50000  | 16700 | 5500  | 14000  | 11475 | 20700 | 113840 | 20286 | 7067  | 59850  | 49360  |
| Feb W4 | NA     | 15000 | 17000 | 12600  | 11392 | 10500 | 31180  | NA    | NA    | 74266  | NA     |

| <b>Year<br/>Week</b> | <b>2010</b> | <b>2011</b> | <b>2012</b> | <b>2013</b> | <b>2014</b> | <b>2015</b> | <b>2016</b> | <b>2017</b> | <b>2018</b> | <b>2019</b> | <b>2020</b> |
|----------------------|-------------|-------------|-------------|-------------|-------------|-------------|-------------|-------------|-------------|-------------|-------------|
|----------------------|-------------|-------------|-------------|-------------|-------------|-------------|-------------|-------------|-------------|-------------|-------------|

**Yunlin**

|        |        |       |       |        |       |       |       |      |       |       |       |
|--------|--------|-------|-------|--------|-------|-------|-------|------|-------|-------|-------|
| Nov W1 | NA     | NA    | NA    | NA     | NA    | NA    | NA    | NA   | NA    | NA    | NA    |
| Nov W2 | NA     | 1750  | NA    | NA     | NA    | NA    | NA    | NA   | NA    | NA    | 806   |
| Nov W3 | NA     | 42985 | NA    | 36930  | NA    | NA    | 370   | NA   | NA    | 95    | 2886  |
| Nov W4 | 2035   | 57817 | NA    | 72600  | NA    | 3384  | 1103  | NA   | 415   | 1844  | 2284  |
| Dec W1 | 64120  | 17826 | 3505  | 287480 | NA    | 4511  | 42498 | 602  | 3211  | 2897  | 2875  |
| Dec W2 | 47228  | 18894 | 3397  | 65140  | 14931 | 3318  | 31893 | 7691 | 12072 | 18732 | 4127  |
| Dec W3 | 84444  | 21365 | 8845  | 17090  | 12790 | 3276  | 20478 | 2506 | 24447 | 48685 | 5044  |
| Dec W4 | 44615  | 37186 | 5619  | 20535  | 6660  | 7859  | 48487 | 3790 | 10428 | 32250 | 4049  |
| Jan W1 | 80342  | 12701 | 31541 | 34330  | 4046  | 67506 | 67817 | 1642 | 14423 | 51847 | 4288  |
| Jan W2 | 53227  | 12758 | 30851 | 7040   | 2529  | 52642 | 19024 | 391  | 12596 | 27765 | 6842  |
| Jan W3 | 258278 | 40142 | 54455 | 2260   | 11492 | 10055 | 11458 | 1982 | 1293  | 13507 | 38963 |
| Jan W4 | 266502 | 14013 | 27812 | 24810  | 24186 | 2313  | 30116 | 2308 | 814   | 7456  | 25506 |
| Feb W1 | 61343  | 10402 | 4753  | 33130  | 9130  | 6969  | 9680  | 608  | 3135  | 8678  | 7169  |
| Feb W2 | 48568  | 6129  | 1876  | 7420   | 4228  | 4338  | 6187  | 2108 | 954   | 3778  | 3925  |
| Feb W3 | 12516  | 9671  | 1744  | 2475   | 6181  | 4286  | 5931  | 5106 | 825   | 4164  | 5078  |
| Feb W4 | NA     | 9033  | 1246  | 10490  | 5935  | 1335  | 5490  | 1902 | 105   | 6254  | 3705  |

| <b>Year<br/>Week</b> | <b>2010</b> | <b>2011</b> | <b>2012</b> | <b>2013</b> | <b>2014</b> | <b>2015</b> | <b>2016</b> | <b>2017</b> | <b>2018</b> | <b>2019</b> | <b>2020</b> |
|----------------------|-------------|-------------|-------------|-------------|-------------|-------------|-------------|-------------|-------------|-------------|-------------|
|----------------------|-------------|-------------|-------------|-------------|-------------|-------------|-------------|-------------|-------------|-------------|-------------|

**Chiayi**

|        |        |       |       |        |       |        |       |       |       |        |        |
|--------|--------|-------|-------|--------|-------|--------|-------|-------|-------|--------|--------|
| Nov W1 | NA     | NA    | NA    | NA     | NA    | NA     | NA    | NA    | 370   | 45     | NA     |
| Nov W2 | NA     | 17098 | NA    | NA     | NA    | 4600   | NA    | NA    | 1595  | 217    | 127    |
| Nov W3 | NA     | 33698 | 4080  | 64390  | 6190  | 12333  | 456   | NA    | 985   | 454    | 179    |
| Nov W4 | 13456  | 44637 | 9190  | 155543 | 41952 | 2751   | 1120  | NA    | 17309 | 8862   | 4864   |
| Dec W1 | 53136  | 30957 | 10792 | 688492 | 7864  | 7282   | 56125 | 950   | 18308 | 10979  | 37714  |
| Dec W2 | 49884  | 40387 | 7583  | 81283  | 42693 | 8984   | 24850 | 4911  | 37707 | 47301  | 47265  |
| Dec W3 | 40719  | 43199 | 12567 | 76046  | 34636 | 5049   | 26800 | 2200  | 57060 | 153098 | 37667  |
| Dec W4 | 57354  | 57221 | 21649 | 147977 | 16285 | 25874  | 35669 | 16376 | 58535 | 137353 | 21509  |
| Jan W1 | 89654  | 36662 | 78021 | 156042 | 5548  | 106142 | 52479 | 4642  | 34323 | 126434 | 10234  |
| Jan W2 | 89635  | 13619 | 55119 | 57689  | 3451  | 70600  | 13616 | 3366  | 40061 | 114048 | 49165  |
| Jan W3 | 300924 | 83533 | 81690 | 14990  | 34775 | 37321  | 31347 | 4187  | 20228 | 84276  | 152563 |
| Jan W4 | 203407 | 28644 | 50430 | 80707  | 64561 | 3125   | 25824 | 12021 | 12788 | 63404  | 113920 |
| Feb W1 | 77632  | 22296 | 39340 | 109502 | 18987 | 15744  | 10158 | 2174  | 13773 | 53245  | 53441  |
| Feb W2 | 124935 | 28669 | 23680 | 21240  | 4848  | 17020  | 14277 | 3357  | 11354 | 33698  | 57494  |
| Feb W3 | 90783  | 13740 | 20190 | 4252   | 18260 | 11285  | 4500  | 9527  | 3873  | 75042  | 73043  |
| Feb W4 | NA     | 28739 | 10899 | 50582  | 25338 | 1517   | 3182  | 16195 | NA    | 93170  | 41428  |

| <b>Year<br/>Week</b> | <b>2010</b> | <b>2011</b> | <b>2012</b> | <b>2013</b> | <b>2014</b> | <b>2015</b> | <b>2016</b> | <b>2017</b> | <b>2018</b> | <b>2019</b> | <b>2020</b> |
|----------------------|-------------|-------------|-------------|-------------|-------------|-------------|-------------|-------------|-------------|-------------|-------------|
|----------------------|-------------|-------------|-------------|-------------|-------------|-------------|-------------|-------------|-------------|-------------|-------------|

**Tainan**

|        |    |       |      |       |    |       |    |    |      |    |      |
|--------|----|-------|------|-------|----|-------|----|----|------|----|------|
| Nov W1 | NA | NA    | NA   | NA    | NA | NA    | NA | NA | NA   | NA | NA   |
| Nov W2 | NA | 26836 | NA   | NA    | NA | NA    | NA | NA | NA   | NA | NA   |
| Nov W3 | NA | 52655 | 2100 | 11545 | NA | 35500 | NA | NA | 3397 | NA | 3000 |

|        |        |       |       |        |        |        |        |       |       |        |        |
|--------|--------|-------|-------|--------|--------|--------|--------|-------|-------|--------|--------|
| Nov W4 | 10854  | 54186 | 7050  | 198937 | 54340  | 5400   | NA     | NA    | 15958 | 12957  | 27450  |
| Dec W1 | 44927  | 25735 | 6540  | 427266 | 42317  | 48423  | 5357   | NA    | 19707 | 27507  | 13500  |
| Dec W2 | 60644  | 31678 | 8720  | 577121 | 46864  | 16273  | 118520 | 4500  | 39372 | 56950  | 45000  |
| Dec W3 | 44373  | 24195 | 13341 | 58168  | 48662  | 10500  | 55388  | 12185 | 75883 | 251153 | 134400 |
| Dec W4 | 51554  | 30657 | 16921 | 66779  | 80041  | 8110   | 81949  | 16050 | 89747 | 168456 | 53250  |
| Jan W1 | 64643  | 17049 | 52121 | 207251 | 26694  | 139129 | 69946  | 17648 | NA    | 136803 | 28350  |
| Jan W2 | 96484  | 5782  | 58971 | 124201 | 4310   | 84900  | 103088 | 4980  | 77780 | 213113 | 58752  |
| Jan W3 | 246087 | 47819 | 73663 | 24148  | 193888 | 66900  | 25398  | 7930  | 31970 | 130600 | 76661  |
| Jan W4 | 192815 | 16237 | 71467 | 38283  | 172694 | 53988  | 78709  | 7400  | 23617 | 88255  | 307500 |
| Feb W1 | 50783  | 18962 | 38328 | 178500 | 58988  | 4600   | 49578  | 16270 | 29915 | NA     | 147750 |
| Feb W2 | 124775 | 30705 | 22133 | 76584  | 83300  | NA     | NA     | 4400  | NA    | 117712 | 150341 |
| Feb W3 | 43099  | 10931 | 13259 | 4495   | 13257  | NA     | 32680  | 9320  | 21250 | NA     | 92850  |
| Feb W4 | NA     | 21146 | 14479 | 28939  | 78753  | 64920  | 11850  | NA    | 5753  | 119485 | 141300 |

| <b>Year<br/>Week</b> | <b>2010</b> | <b>2011</b> | <b>2012</b> | <b>2013</b> | <b>2014</b> | <b>2015</b> | <b>2016</b> | <b>2017</b> | <b>2018</b> | <b>2019</b> | <b>2020</b> |
|----------------------|-------------|-------------|-------------|-------------|-------------|-------------|-------------|-------------|-------------|-------------|-------------|
|----------------------|-------------|-------------|-------------|-------------|-------------|-------------|-------------|-------------|-------------|-------------|-------------|

#### Pingtung

|        |       |       |        |        |        |       |        |      |       |        |       |
|--------|-------|-------|--------|--------|--------|-------|--------|------|-------|--------|-------|
| Nov W1 | NA    | 2311  | 1827   | NA     | 4735   | 13638 | NA     | NA   | 800   | 97     | 135   |
| Nov W2 | NA    | 6996  | 2993   | NA     | 30242  | 13918 | NA     | NA   | 1612  | 1169   | 13399 |
| Nov W3 | 15181 | 17400 | 4421.5 | 200106 | 47480  | 3210  | 41259  | 4    | 1322  | 4900   | 12744 |
| Nov W4 | 24042 | 11589 | 1179   | 154778 | 20839  | 2633  | 28127  | 13   | 6158  | 8587   | 9831  |
| Dec W1 | 38407 | 9780  | 3046   | 124918 | 128465 | 291   | 110637 | 65   | 11428 | 25202  | 20494 |
| Dec W2 | 19931 | 7667  | 1376   | 66755  | 45240  | 536   | 146235 | 402  | 17475 | 99576  | 27194 |
| Dec W3 | 23019 | 7320  | 5853   | 49744  | 31820  | 8010  | 54750  | 766  | 4091  | 164915 | 8777  |
| Dec W4 | 2792  | 3926  | 1147   | 58494  | 16903  | 22040 | 109695 | 1180 | 3544  | 56278  | 10535 |
| Jan W1 | 5190  | 540   | 797    | 44411  | 14684  | 76600 | 143380 | 4100 | 6518  | 20673  | 9220  |
| Jan W2 | 13887 | 1398  | 1824   | 30063  | 6743   | 8965  | 32823  | 3167 | 2304  | 14875  | 12226 |
| Jan W3 | 41374 | 3420  | 1605   | 30378  | 6349   | 1250  | 3820   | 3700 | 1666  | 7900   | 8997  |
| Jan W4 | NA    | NA    | 617    | 22042  | 5959   | 302   | NA     | 1553 | 1053  | 4402   | 6430  |
| Feb W1 | NA    | 2560  | 558    | 20246  | 5140   | 996   | NA     | 1881 | 247   | 1050   | 1226  |
| Feb W2 | 150   | 132   | 298    | 6525   | 5254   | 360   | NA     | 1750 | NA    | 6526   | 800   |
| Feb W3 | 643   | NA    | NA     | 3452   | 3968   | 730   | NA     | 454  | NA    | 5668   | NA    |
| Feb W4 | NA    | NA    | 138    | 12551  | 1524   | 180   | NA     | 183  | NA    | 2008   | 1900  |

| <b>Year<br/>Week</b> | <b>2010</b> | <b>2011</b> | <b>2012</b> | <b>2013</b> | <b>2014</b> | <b>2015</b> | <b>2016</b> | <b>2017</b> | <b>2018</b> | <b>2019</b> | <b>2020</b> |
|----------------------|-------------|-------------|-------------|-------------|-------------|-------------|-------------|-------------|-------------|-------------|-------------|
|----------------------|-------------|-------------|-------------|-------------|-------------|-------------|-------------|-------------|-------------|-------------|-------------|

#### Ilan

|        |         |        |        |         |       |        |        |       |        |        |         |
|--------|---------|--------|--------|---------|-------|--------|--------|-------|--------|--------|---------|
| Nov W1 | 48892   | 255978 | 9587   | 43620   | NA    | 3681   | 515    | NA    | NA     | NA     | 15597   |
| Nov W2 | 221291  | 398133 | 13286  | 415051  | NA    | 44752  | 21147  | 810   | NA     | NA     | 141637  |
| Nov W3 | 730543  | 123660 | 26928  | 651978  | NA    | 115883 | 187550 | 1824  | 375    | 29580  | 144016  |
| Nov W4 | 503106  | 32387  | 59628  | 1495656 | NA    | 48997  | 279083 | 5865  | 24952  | 88564  | 163036  |
| Dec W1 | 1177462 | 28190  | 111132 | 2016460 | 743   | 65161  | 440592 | 5121  | 187547 | 61502  | 266983  |
| Dec W2 | 631147  | 96574  | 124668 | 510030  | 6225  | 59684  | 208530 | 4530  | 329236 | 57212  | 930966  |
| Dec W3 | 114367  | 171738 | 133839 | 527840  | 15051 | 23001  | 183945 | 7908  | 164175 | 69929  | 484108  |
| Dec W4 | 134563  | 49176  | 62652  | 774006  | 23596 | 5033   | 221997 | 7053  | 140501 | 277476 | 522063  |
| Jan W1 | 428560  | 41229  | 170064 | 667711  | 15078 | 73746  | 65808  | 4890  | 242883 | 189366 | 526981  |
| Jan W2 | 446248  | 48373  | 378542 | 413972  | 45564 | 107560 | 23139  | 9738  | 256820 | 181628 | 1542659 |
| Jan W3 | 172469  | 64473  | 231965 | 201501  | 70462 | 265736 | 1140   | 46266 | 176499 | 410798 | 2039338 |
| Jan W4 | 15311   | 35316  | 51900  | 150843  | 66347 | 50762  | 7443   | 42609 | 9890   | 839282 | 1515684 |
| Feb W1 | 3113    | 73257  | 10374  | 413140  | 12792 | 13271  | 8289   | 63930 | 5810   | 563676 | 394377  |
| Feb W2 | NA      | 31652  | 12390  | 89649   | 5846  | 7606   | 8631   | 72117 | NA     | 247842 | 380001  |
| Feb W3 | NA      | 31779  | 1323   | 13035   | 7474  | NA     | 3291   | 91935 | NA     | 13348  | 310636  |
| Feb W4 | NA      | 7335   | 654    | 4447    | 5510  | NA     | 7305   | 70485 | NA     | 5516   | 124542  |

| <b>Year<br/>Week</b> | <b>2010</b> | <b>2011</b> | <b>2012</b> | <b>2013</b> | <b>2014</b> | <b>2015</b> | <b>2016</b> | <b>2017</b> | <b>2018</b> | <b>2019</b> | <b>2020</b> |
|----------------------|-------------|-------------|-------------|-------------|-------------|-------------|-------------|-------------|-------------|-------------|-------------|
|----------------------|-------------|-------------|-------------|-------------|-------------|-------------|-------------|-------------|-------------|-------------|-------------|

#### Hualien

|        |       |       |      |       |      |       |       |    |      |      |       |
|--------|-------|-------|------|-------|------|-------|-------|----|------|------|-------|
| Nov W1 | NA    | 7850  | 123  | 4374  | NA   | 1622  | 599   | NA | NA   | 735  | 1224  |
| Nov W2 | NA    | 9960  | 507  | 9399  | 116  | 17412 | 3501  | NA | NA   | 1394 | 4946  |
| Nov W3 | 23990 | 45160 | 3305 | 67045 | 2330 | 60781 | 49966 | 58 | 1741 | 1484 | 29431 |
| Nov W4 | 19985 | 45197 | 3793 | 72731 | 4687 | 55614 | 91659 | 62 | 8560 | 2630 | 64891 |

|                      |             |             |             |             |             |             |             |             |             |             |             |
|----------------------|-------------|-------------|-------------|-------------|-------------|-------------|-------------|-------------|-------------|-------------|-------------|
| Dec W1               | 26070       | 25051       | 1345        | 114945      | 4750        | 34911       | 119937      | 765         | 24553       | 3994        | 74971       |
| Dec W2               | 82980       | 12973       | 2317        | 105752      | 5178        | 27087       | 98071       | 3316        | 29731       | 5015        | 91024       |
| Dec W3               | 63600       | 28711       | 2047        | 122704      | 5145        | 28968       | 84929       | 5359        | 32220       | 9726        | 65146       |
| Dec W4               | 35410       | 32008       | 2104        | 142244      | 8281        | 18267       | 33029       | 3211        | 42560       | 12261       | 50391       |
| Jan W1               | 26600       | 19414       | 4010        | 142469      | 8224        | 22363       | 26280       | 2843        | 36520       | 16027       | 45612       |
| Jan W2               | 63720       | 4322        | 29972       | 117280      | 6558        | 48859       | 24754       | 2698        | 43764       | 15609       | 49840       |
| Jan W3               | 54520       | 2444        | 54012       | 76284       | 5921        | 71023       | 15723       | 3445        | 53062       | 5339        | 122580      |
| Jan W4               | 20775       | 814         | 50071       | 43096       | 6080        | 19289       | 6738        | 2885        | 15976       | 163720      | 65326       |
| Feb W1               | 6870        | 5125        | 18823       | 18152       | 4464        | 10254       | 2714        | 5357        | 4624        | 223803      | 130974      |
| Feb W2               | 1185        | 1866        | 11537       | 6805        | 2902        | 6054        | 1142        | 3959        | 1936        | 82895       | 146411      |
| Feb W3               | NA          | 1564        | 7695        | 2979        | 2650        | 1831        | 1176        | 8298        | 557         | 21916       | 50717       |
| Feb W4               | NA          | 2752        | 4297        | 1558        | 1774        | 901         | 902         | 38317       | 667         | 13157       | 20166       |
| <b>Year<br/>Week</b> | <b>2010</b> | <b>2011</b> | <b>2012</b> | <b>2013</b> | <b>2014</b> | <b>2015</b> | <b>2016</b> | <b>2017</b> | <b>2018</b> | <b>2019</b> | <b>2020</b> |
| <b>Taitung</b>       |             |             |             |             |             |             |             |             |             |             |             |
| Nov W1               | NA          | NA          | NA          | 1225        | NA          | 389         | 307         | NA          | NA          | 63          | NA          |
| Nov W2               | NA          | NA          | NA          | 1584        | 238         | NA          | 12208       | NA          | NA          | 165         | 1156        |
| Nov W3               | NA          | NA          | NA          | 4165        | 983         | 5439        | NA          | 109         | NA          | 457         | 2508        |
| Nov W4               | NA          | NA          | NA          | 15421       | 1894        | 17854       | 42138       | 130         | 558         | 679         | 4990        |
| Dec W1               | NA          | NA          | NA          | 27324       | 1995        | 18655       | 120000      | 195         | 3915        | 712         | 8180        |
| Dec W2               | NA          | NA          | NA          | 23726       | 1238        | 12288       | 280000      | 652         | 5331        | 776         | 17587       |
| Dec W3               | NA          | NA          | NA          | 40340       | 1003        | 10927       | 300000      | 593         | 7852        | 1095        | 13791       |
| Dec W4               | NA          | NA          | NA          | 26437       |             | 8592        | 470000      | 573         | 6091        | 1396        | 16798       |
| Jan W1               | NA          | NA          | NA          | 31031       | 1592        | 6736        | NA          | 613         | 8291        | 1694        | 18209       |
| Jan W2               | NA          | NA          | NA          | 29721       | 1388        | 6891        | 170000      | 484         | 9121        | 22005       | 15983       |
| Jan W3               | NA          | NA          | NA          | 12913       | 1686        | 12007       | 120000      | 925         | 9554        | 8987        | 15593       |
| Jan W4               | NA          | NA          | NA          | 10123       | 1773        | 10994       | 130000      | 596         | 7983        | 3785        | 29227       |
| Feb W1               | NA          | NA          | NA          | 6853        | 1329        | 8895        | 15000       | 818         | 5234        | 14181       | 19817       |
| Feb W2               | NA          | NA          | NA          | 6003        | 1068        | 6134        | 6000        | 615         | 2145        | 26333       | 19527       |
| Feb W3               | NA          | NA          | NA          | 4933        | 1129        | 1472        | NA          | 705         | 188         | 10216       | 15897       |
| Feb W4               | NA          | NA          | NA          | 2775        | 1088        | 1220        | NA          | 5498        | NA          | 6019        | 10895       |
